# Supplementary material
Source: Springer Nature journal article supplement (https://www.springermedizin.de/resource/supplementary/12889_2014_7042_MOESM3_ESM.pdf/9499600)

Ghana

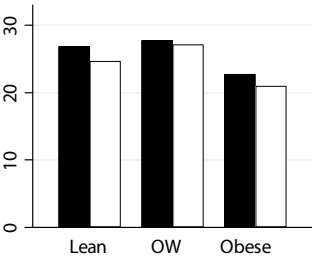

South Africa

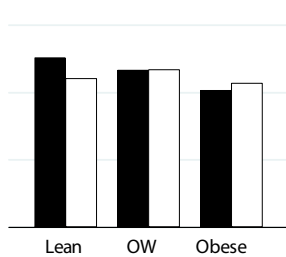

Jamaica

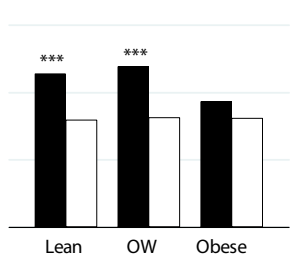

Seychelles

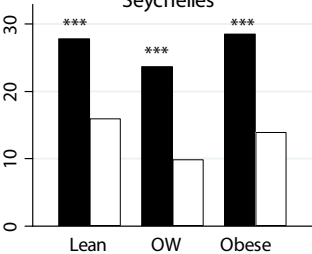

USA

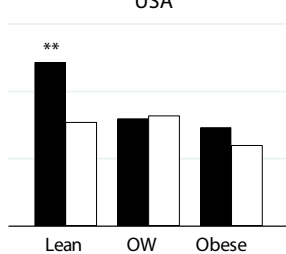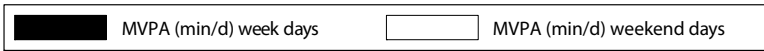

Supplement: MOESM3 [file 9499600]
